# Supplementary material for: Plasma cell-free RNA profiling distinguishes cancers from pre-malignant conditions in solid and hematologic malignancies
Source: PubMed Central journal article supplement (PMC9038724; doi:10.1038/s41698-022-00270-y), 2022-04-25
Supplement: 41698_2022_270_MOESM1_ESM.pdf [file 41698_2022_270_MOESM1_ESM.pdf]

## **Plasma cell-free RNA profiling distinguishes cancers from pre-malignant conditions in solid and hematologic malignancies**

Breeshey Roskams-Hieter<sup>1,\*</sup>, Hyun Ji Kim<sup>1,2,\*</sup>, Pavana Anur<sup>1</sup>, Josiah T. Wagner<sup>1</sup>, Rowan Callahan<sup>1,2</sup>, Elias Spiliotopoulos<sup>1</sup>, Charles Ward Kirschbaum<sup>1</sup>, Fehmi Civitci<sup>1</sup>, Paul Spellman<sup>1,3,4</sup>, Reid F. Thompson<sup>1,2,4,5,6</sup>, Khashayar Farsad<sup>7</sup>, Willscott E. Naugler<sup>7</sup>, Thuy T. M. Ngo<sup>1,2,3,✉</sup>

<sup>1</sup>Cancer Early Detection Advanced Research Center (CEDAR), Knight Cancer Institute, Oregon Health and Science University, Portland, OR

<sup>2</sup>Department of Biomedical Engineering, Oregon Health and Science University, Portland, OR

<sup>3</sup>Department of Molecular and Medical Genetics, Oregon Health and Science University, Portland, OR

<sup>4</sup>Computational Biology Program, Oregon Health and Science University, Portland, OR

<sup>5</sup>Department of Radiation Medicine, Oregon Health and Science University, Portland, OR

<sup>6</sup>Division of Hospital and Specialty Medicine, VA Portland Healthcare System, Portland, OR

<sup>7</sup>Dotter Department of Interventional Radiology, Oregon Health and Science University, Portland, OR

<sup>8</sup>Division of Gastroenterology and Hepatology, School of Medicine, Oregon Health and Science University, Portland, OR

\*Equal contribution

✉Corresponding: [ngth@ohsu.edu](mailto:ngth@ohsu.edu)

## Supplementary Figures

a

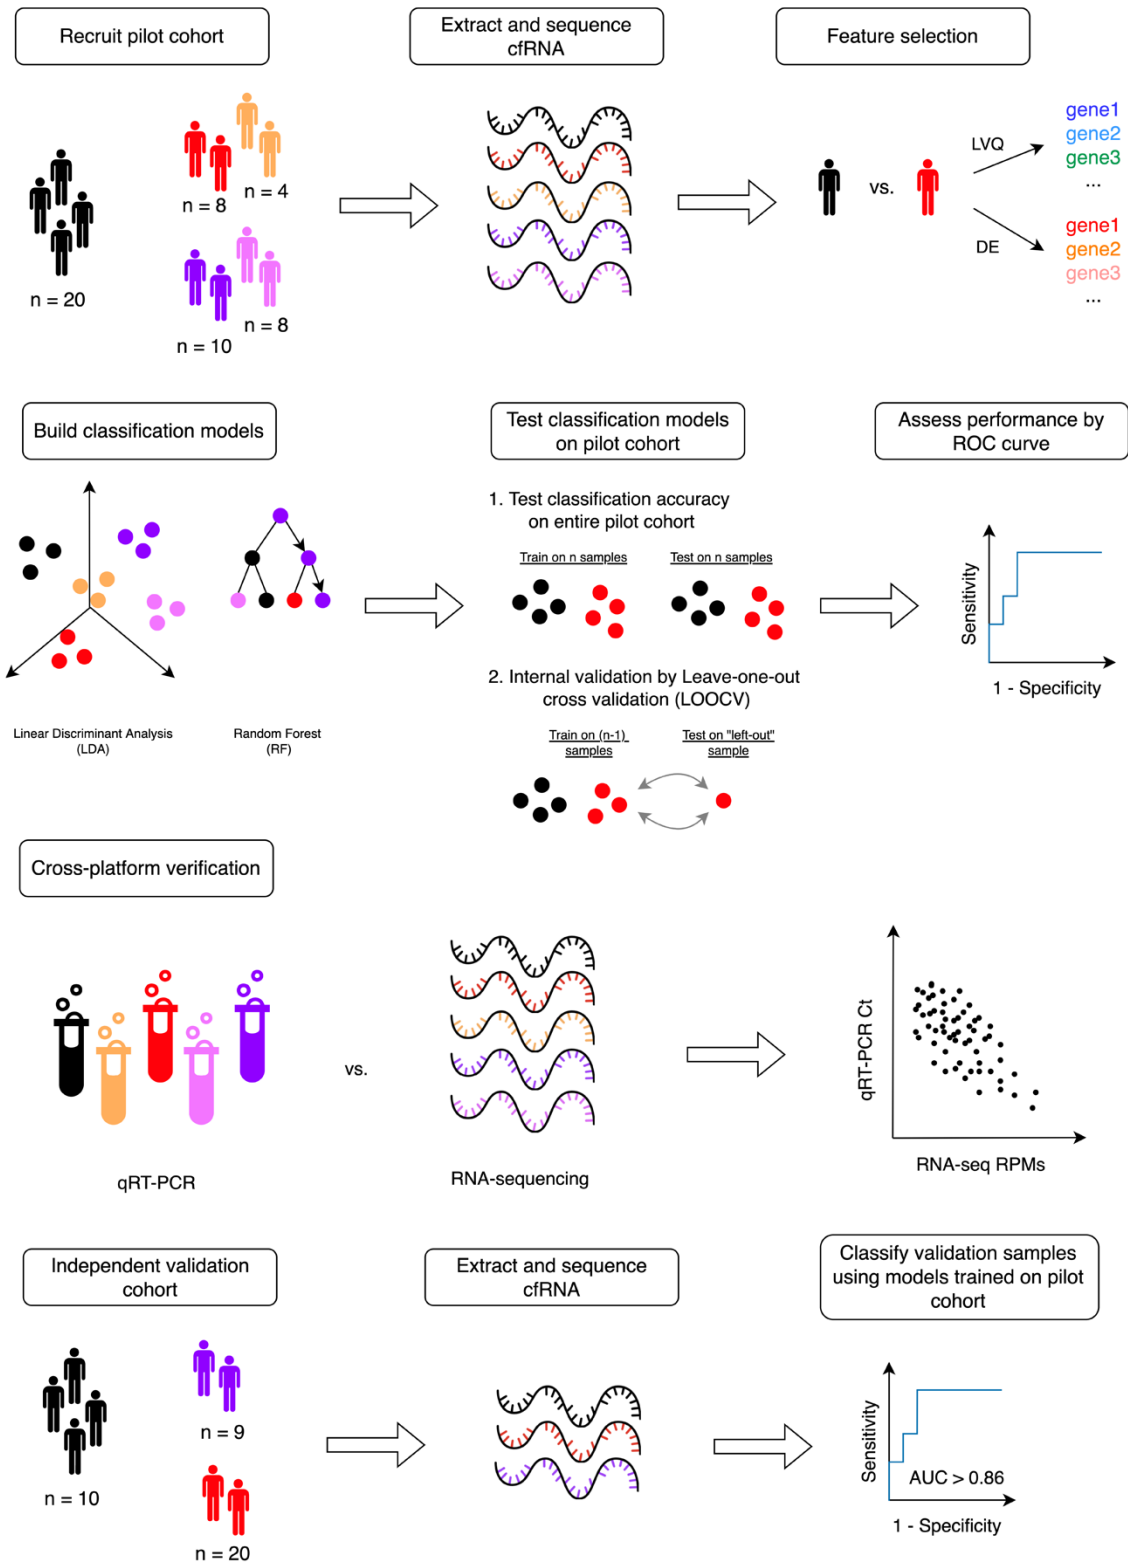

**Supplementary Figure 1** | Illustration of overall sample sets and analytic methods used in this study.

a

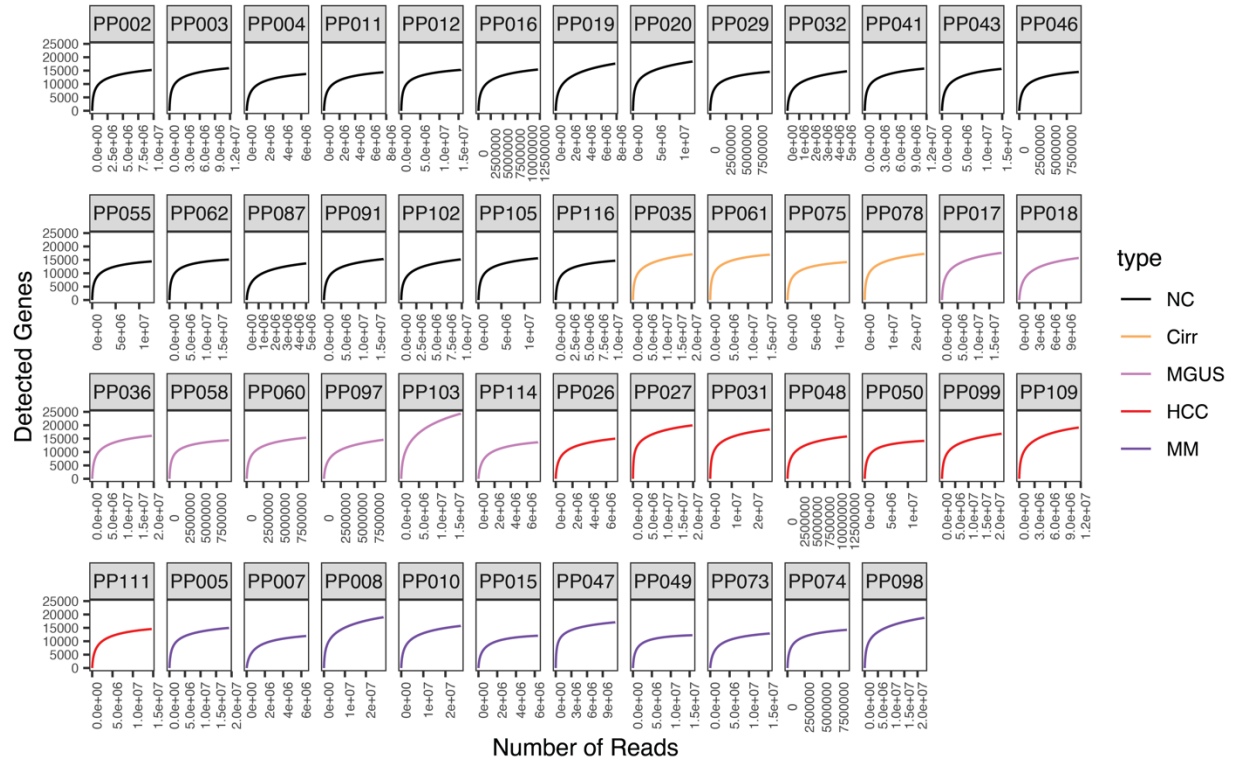

**Supplementary Figure 2 |** Sequencing saturation analysis of all 50 samples in the pilot cohort. Total reads for each sample were subsampled (x-axis) and the number of genes detected at that read depth is reported (y-axis).

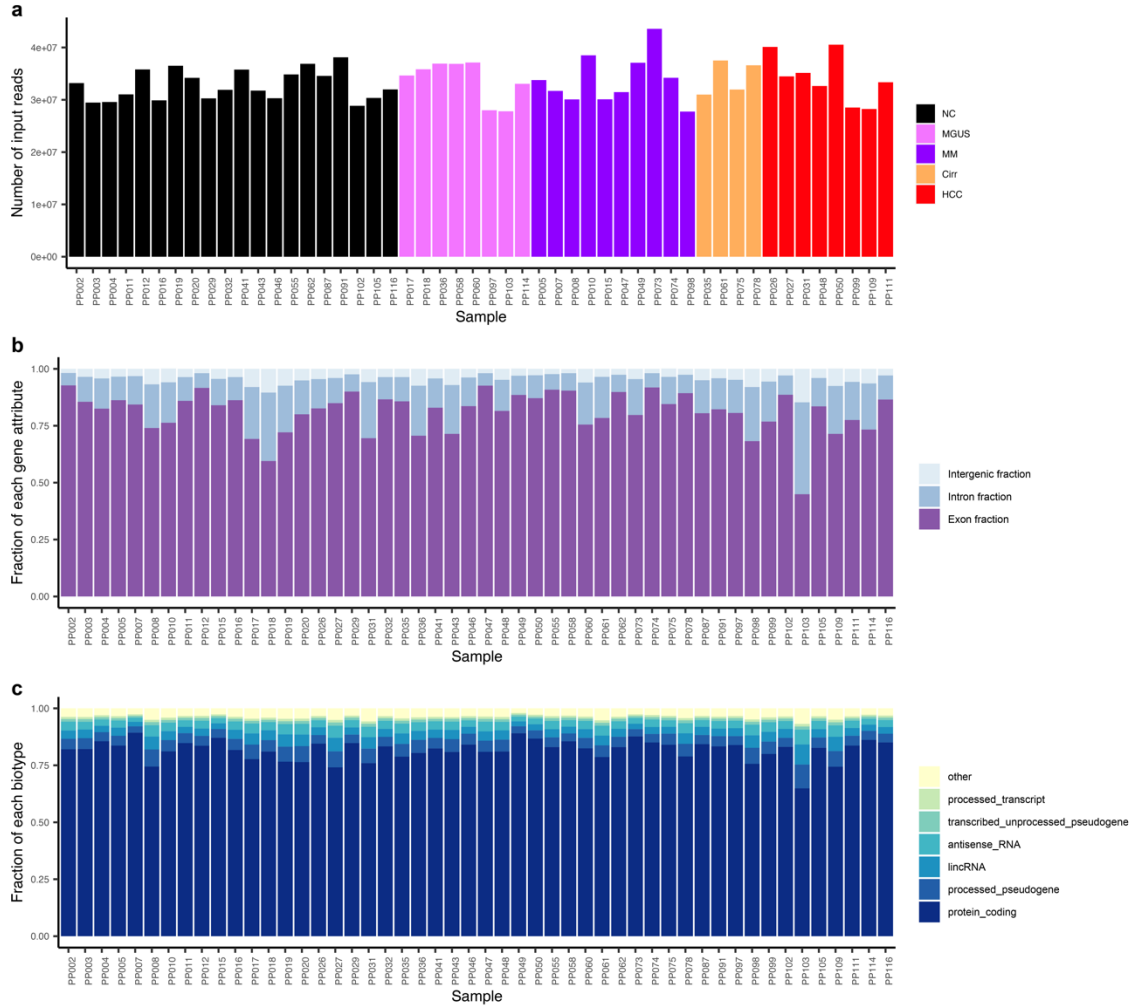

**Supplementary Figure 3** | Distribution of (a) sequencing reads, (b) exon/intron and intergenic fractions, and (c) coverage of the transcriptome across all 50 samples in the pilot cohort.

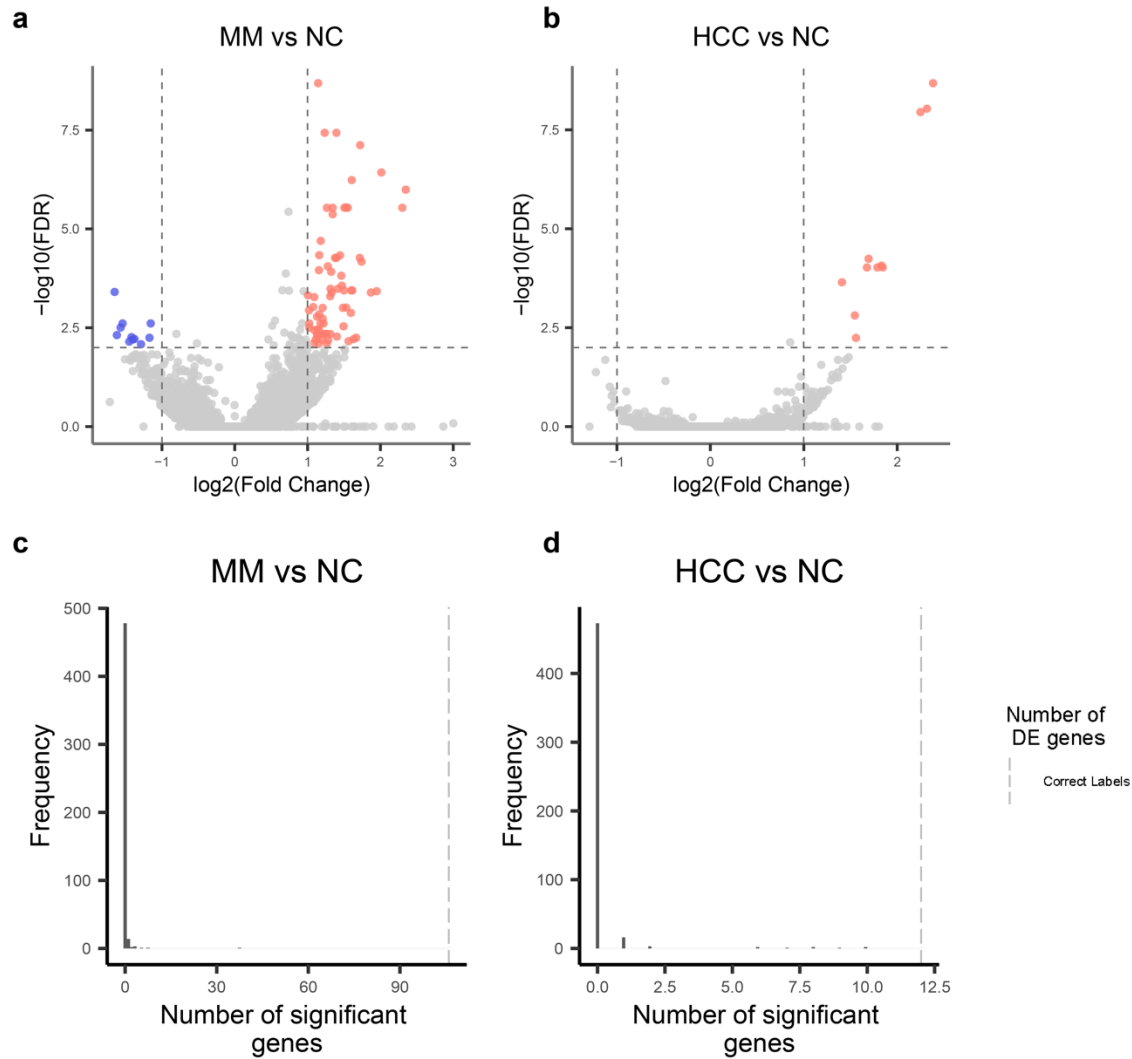

**Supplementary Figure 4** | Volcano plots between false discovery rate (FDR) and fold changes for all genes in pairwise comparison between non-cancer (NC) donors and (a) multiple myeloma (MM) and (b) liver cancer (HCC) analyzed by DESeq2. Histograms of number of significant genes differentiating two groups from random permutation between samples across non-cancer donors and (c) multiple myeloma or (d) liver cancer. Differential expression analysis was performed using DESeq2 with Wald test and adjusted p-value cutoff at 0.01. Here we report the results from pairwise comparisons in the pilot cohort.

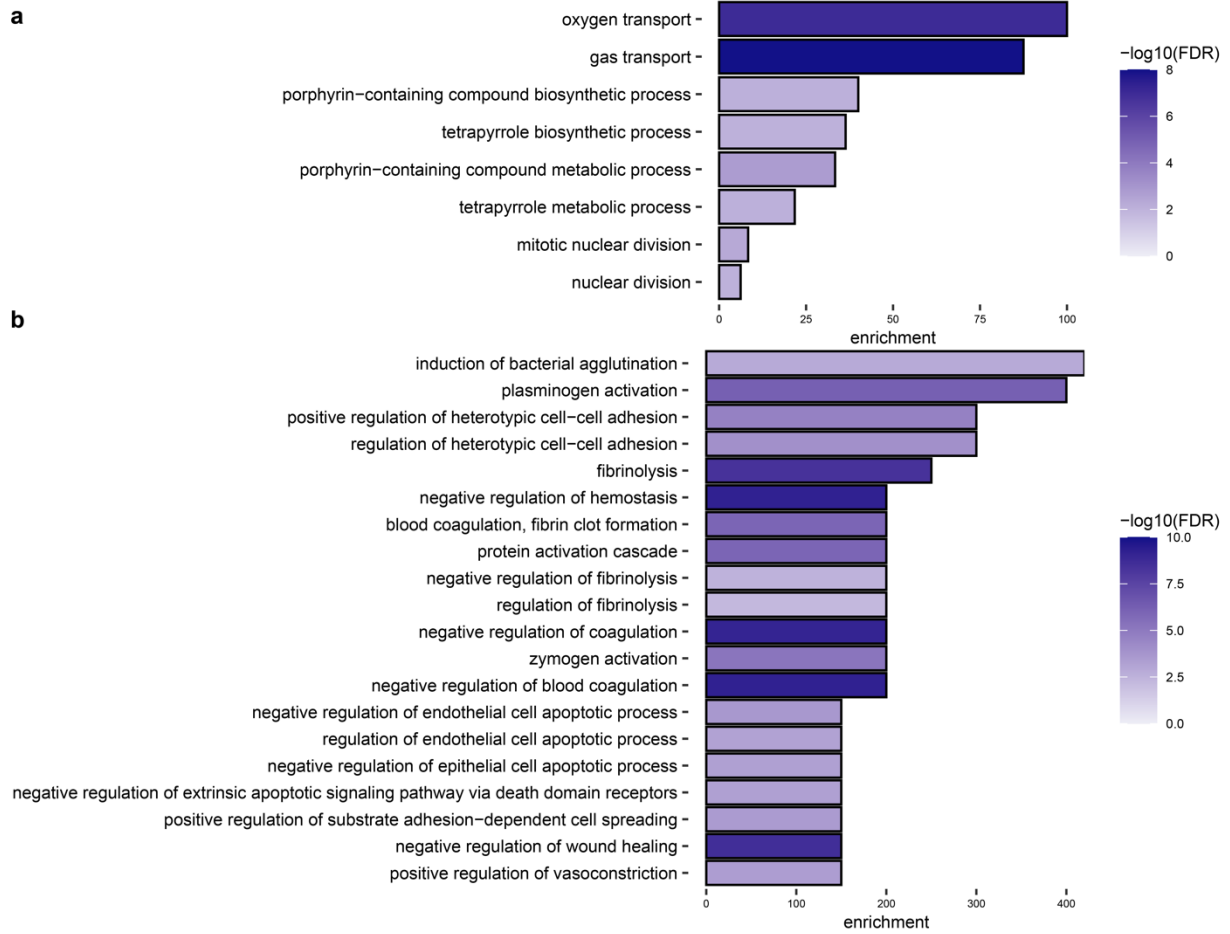

**Supplementary Figure 5** | Gene Ontology analysis shows enrichment of biological processes for the significant gene panels identified by DESeq2 analysis for each pairwise comparison between the non-cancer group and (a) multiple myeloma and (b) liver cancer groups in the pilot cohort.

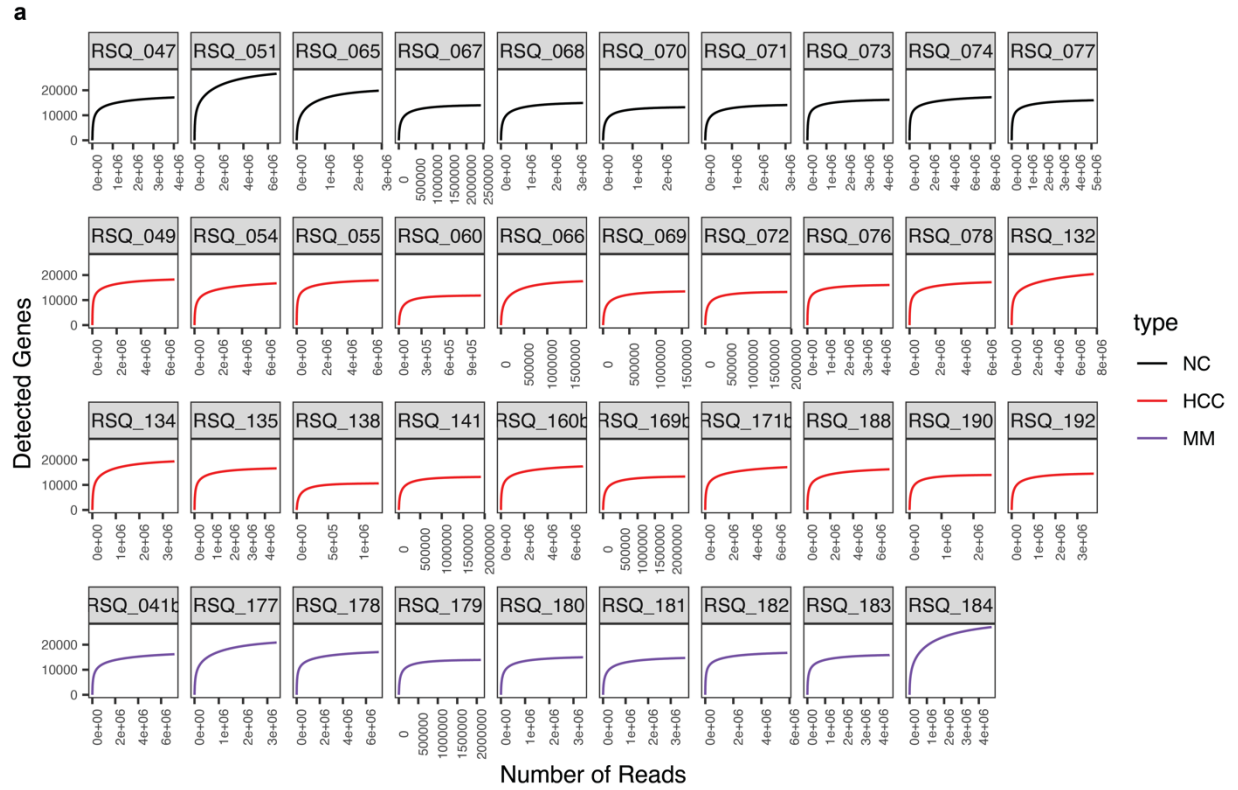

**Supplementary Figure 6 |** Sequencing saturation analysis of all 39 samples in the independent validation cohort. Total reads for each sample were subsampled (x-axis) and the number of genes detected at that read depth is reported (y-axis).

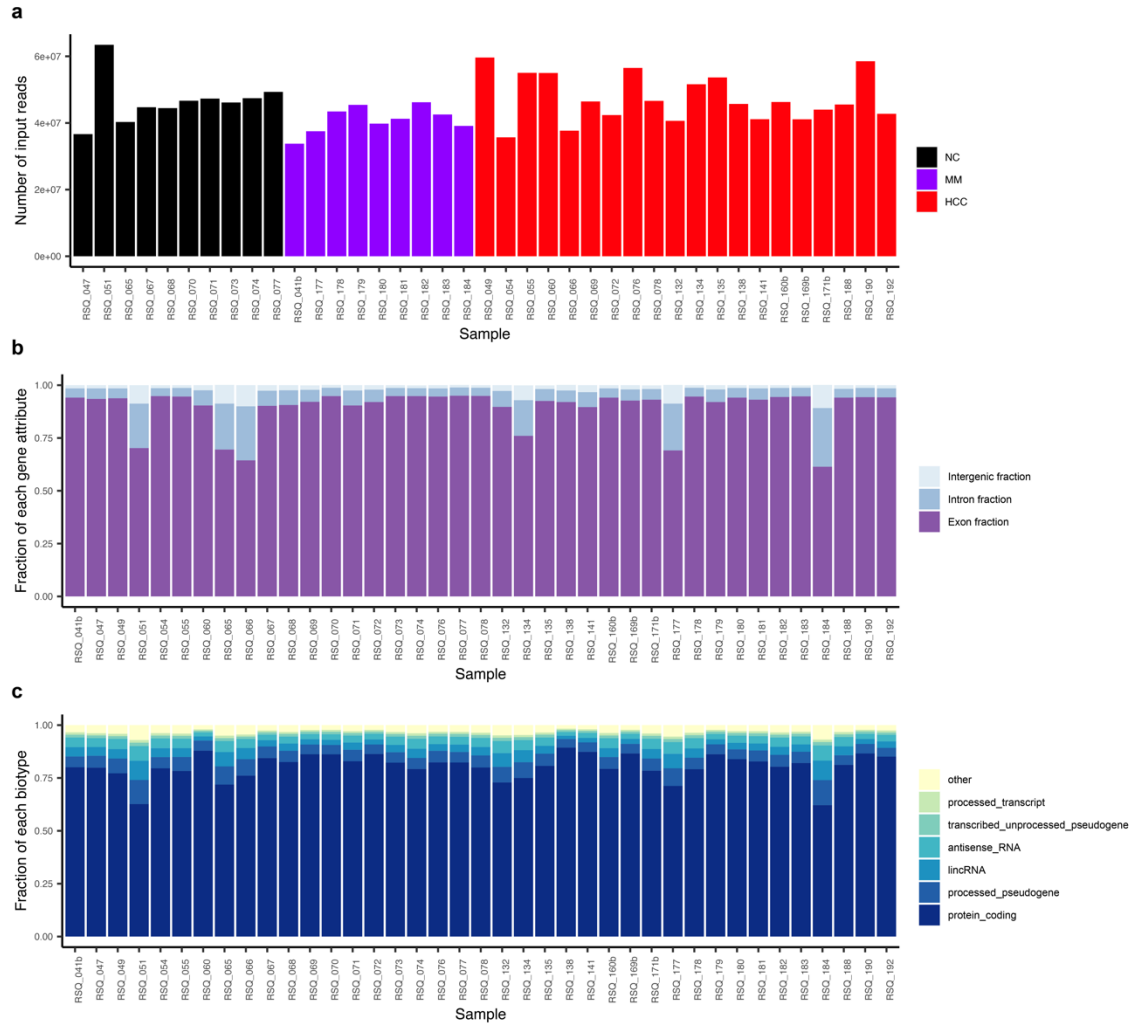

**Supplementary Figure 7 |** Distribution of (a) sequencing reads, (b) exon/intron and intergenic fractions, and (c) coverage of the transcriptome across all 39 samples in the independent validation cohort.



HCC - Pilot

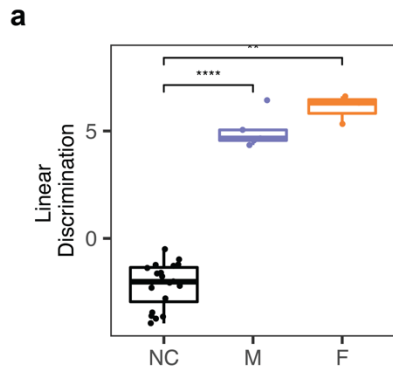

MM - Pilot

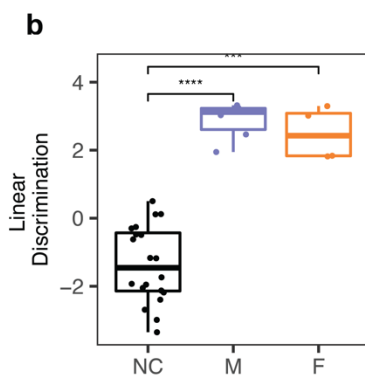

HCC - Validation

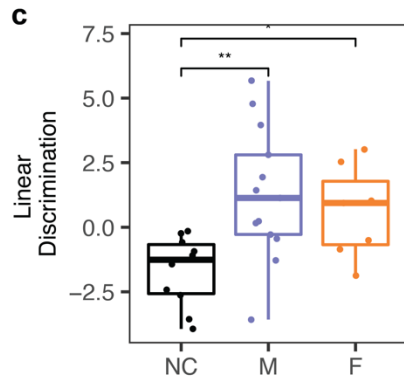

MM - Validation

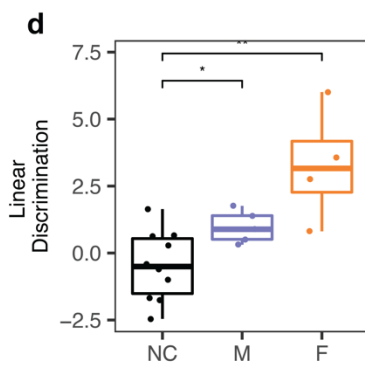

**Supplementary Figure 8 |** Linear Discriminant Analysis (LDA) across males and females in HCC and MM in our pilot cohort (**a, b**). Using the models trained on our pilot cohort, we also tested discrimination by LDA in our external validation set for both HCC and MM across males and females (**c, d**). P-values for each pair are calculated by the Wilcoxon rank sum test. Centre-line indicates the median value across all patients in that group, and the hinges represent the lower (Q1) and upper (Q3) quartile, with whiskers extending to the minimum and maximum of the resulting distribution.

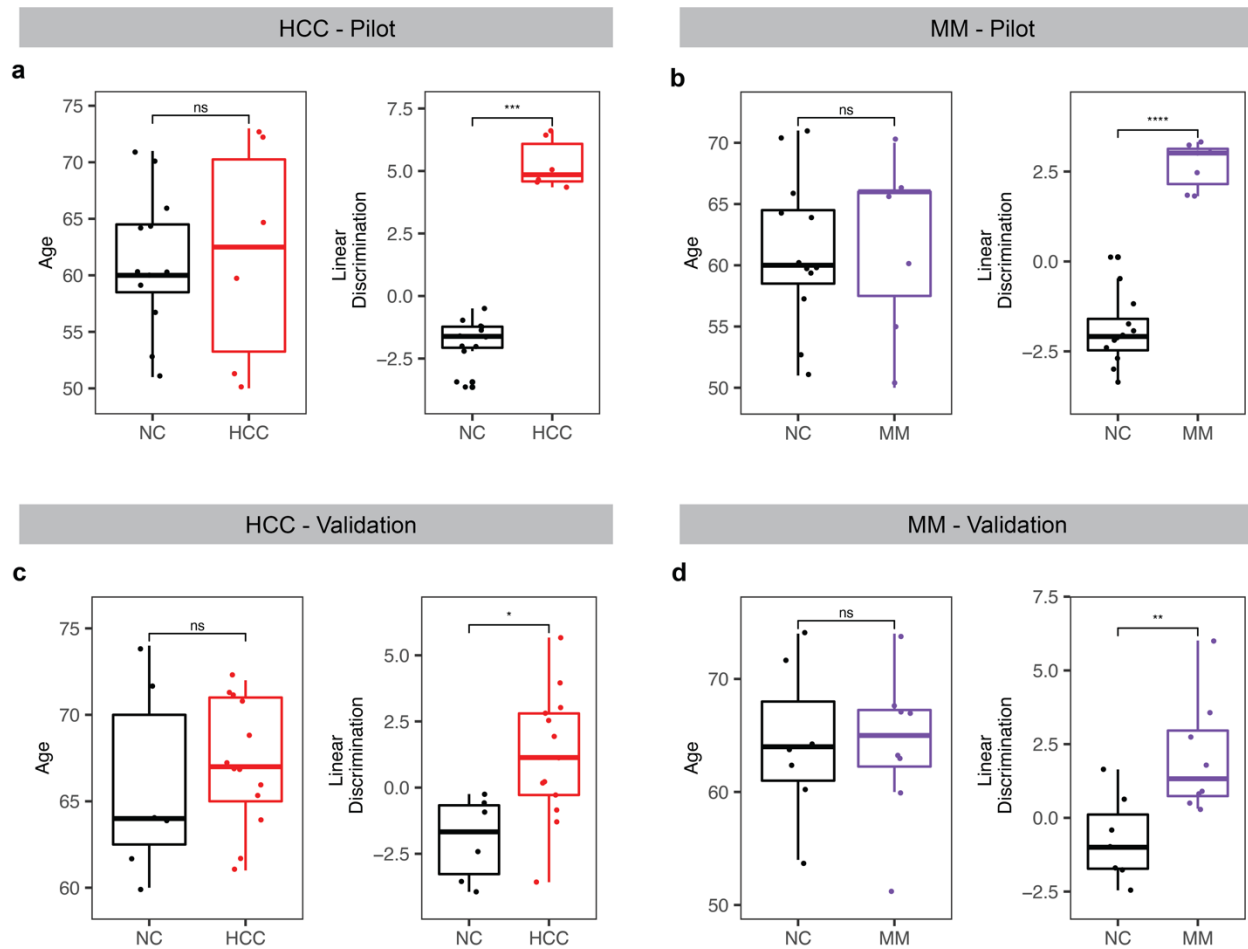

**Supplementary Figure 9 |** Linear Discriminant for the subset of the samples in which cases and controls had comparable median age and standard deviation. In this reduced sample set, we show that when a difference in age between cases and controls is not significant, discrimination by Linear Discriminant Analysis (LDA) is still significant. This was done with the models trained on our pilot cohort, and tested for each pairwise comparison of NC – HCC (**a**), NC – MM (**b**) in our pilot cohort, and our validation cohort (**c,d**). P-values for each pair are calculated by the Wilcoxon rank sum test. Centre-line indicates the median value across all patients in that group, and the hinges represent the lower (Q1) and upper (Q3) quartile, with whiskers extending to the minimum and maximum of the resulting distribution.

## Supplementary Tables

**Supplementary Table 1** | Clinical Information for the pilot sample set and validation sample set

| Set   | SeqID | Age | Sex | Group            | Stage | Etiology                                      | Race               |
|-------|-------|-----|-----|------------------|-------|-----------------------------------------------|--------------------|
| Pilot | PP027 | 73  | M   | Liver Cancer     | C     | na                                            | WHITE              |
| Pilot | PP099 | 72  | M   | Liver Cancer     | B     | Hemochromatosis, jaundice, Gilberts disease   | WHITE              |
| Pilot | PP048 | 60  | F   | Liver Cancer     | D     | NASH                                          | WHITE              |
| Pilot | PP026 | 65  | M   | Liver Cancer     | A     | NASH                                          | MORE THAN ONE RACE |
| Pilot | PP031 | 51  | M   | Liver Cancer     | A     | HCV+                                          | WHITE              |
| Pilot | PP109 | 75  | F   | Liver Cancer     | C     | NASH, Cirrhosis                               | WHITE              |
| Pilot | PP050 | 82  | F   | Liver Cancer     | A     | NASH                                          | WHITE              |
| Pilot | PP111 | 50  | M   | Liver Cancer     | A     | NASH                                          | WHITE              |
| Pilot | PP078 | 59  | F   | Liver Cirrhosis  | na    | Cirrhosis secondary to sarcoidosis, HCV-/HBV- | WHITE              |
| Pilot | PP061 | 50  | F   | Liver Cirrhosis  | na    | HCV+, Hepatitis                               | WHITE              |
| Pilot | PP035 | 48  | F   | Liver Cirrhosis  | na    | Hepatitis                                     | WHITE              |
| Pilot | PP075 | 33  | M   | Liver Cirrhosis  | na    | Budd Chiari                                   | WHITE              |
| Pilot | PP073 | 66  | M   | Multiple Myeloma | I     | na                                            | WHITE              |
| Pilot | PP010 | 66  | M   | Multiple Myeloma | II    | na                                            | WHITE              |
| Pilot | PP008 | 70  | F   | Multiple Myeloma | II    | na                                            | WHITE              |
| Pilot | PP047 | 31  | M   | Multiple Myeloma | II    | na                                            | WHITE              |
| Pilot | PP015 | 66  | F   | Multiple Myeloma | III   | na                                            | WHITE              |
| Pilot | PP074 | 35  | F   | Multiple Myeloma | II    | na                                            | WHITE              |
| Pilot | PP098 | 55  | M   | Multiple Myeloma | II    | na                                            | WHITE              |
| Pilot | PP005 | 60  | M   | Multiple Myeloma | II    | na                                            | WHITE              |
| Pilot | PP007 | 50  | F   | Multiple Myeloma | I     | na                                            | WHITE              |
| Pilot | PP049 | 73  | M   | Multiple Myeloma | III   | na                                            | WHITE              |
| Pilot | PP097 | 64  | F   | MGUS             | na    | na                                            | WHITE              |
| Pilot | PP018 | 73  | M   | MGUS             | na    | na                                            | WHITE              |
| Pilot | PP060 | 68  | M   | MGUS             | na    | na                                            | WHITE              |
| Pilot | PP036 | 57  | M   | MGUS             | na    | na                                            | WHITE              |
| Pilot | PP114 | 70  | F   | MGUS             | na    | na                                            | WHITE              |
| Pilot | PP103 | 56  | F   | MGUS             | na    | na                                            | WHITE              |
| Pilot | PP058 | 67  | M   | MGUS             | na    | na                                            | WHITE              |
| Pilot | PP017 | 64  | M   | MGUS             | na    | na                                            | WHITE              |
| Pilot | PP102 | 47  | M   | Non-Cancer       | na    | na                                            | WHITE              |
| Pilot | PP055 | 37  | F   | Non-Cancer       | na    | na                                            | WHITE              |
| Pilot | PP019 | 59  | F   | Non-Cancer       | na    | na                                            | WHITE              |
| Pilot | PP032 | 57  | M   | Non-Cancer       | na    | na                                            | WHITE              |
| Pilot | PP062 | 71  | F   | Non-Cancer       | na    | na                                            | WHITE              |
| Pilot | PP011 | 60  | F   | Non-Cancer       | na    | na                                            | WHITE              |
| Pilot | PP041 | 64  | F   | Non-Cancer       | na    | na                                            | WHITE              |
| Pilot | PP004 | 46  | F   | Non-Cancer       | na    | na                                            | WHITE              |
| Pilot | PP003 | 42  | M   | Non-Cancer       | na    | na                                            | ASIAN              |
| Pilot | PP105 | 43  | F   | Non-Cancer       | na    | na                                            | WHITE              |
| Pilot | PP012 | 30  | M   | Non-Cancer       | na    | na                                            | WHITE              |
| Pilot | PP046 | 53  | F   | Non-Cancer       | na    | na                                            | WHITE              |
| Pilot | PP087 | 41  | F   | Non-Cancer       | na    | na                                            | WHITE              |
| Pilot | PP016 | 66  | F   | Non-Cancer       | na    | na                                            | WHITE              |
| Pilot | PP029 | 51  | M   | Non-Cancer       | na    | na                                            | ASIAN              |
| Pilot | PP043 | 42  | M   | Non-Cancer       | na    | na                                            | WHITE              |
| Pilot | PP020 | 60  | F   | Non-Cancer       | na    | na                                            | WHITE              |
| Pilot | PP002 | 64  | F   | Non-Cancer       | na    | na                                            | WHITE              |
| Pilot | PP116 | 60  | M   | Non-Cancer       | na    | na                                            | WHITE              |
| Pilot | PP091 | 70  | M   | Non-Cancer       | na    | na                                            | WHITE              |

|            |          |    |   |                  |     |                                            |       |
|------------|----------|----|---|------------------|-----|--------------------------------------------|-------|
| Validation | RSQ_072  | 76 | F | Liver Cancer     | A   | HCV successfully treated                   | WHITE |
| Validation | RSQ_066  | 72 | F | Liver Cancer     | B   | HCV +                                      | WHITE |
| Validation | RSQ_054  | 81 | F | Liver Cancer     | B   | HCV+                                       | WHITE |
| Validation | RSQ_060  | 69 | M | Liver Cancer     | A   | HCV+                                       | WHITE |
| Validation | RSQ_076  | 61 | M | Liver Cancer     | B   | HCV+                                       | WHITE |
| Validation | RSQ_078  | 67 | M | Liver Cancer     | A   | HCV+                                       | WHITE |
| Validation | RSQ_069  | 62 | M | Liver Cancer     | B   | HCV+                                       | WHITE |
| Validation | RSQ_049  | 67 | M | Liver Cancer     | A   | HCV+                                       | WHITE |
| Validation | RSQ_055  | 64 | F | Liver Cancer     | B   | Cirrhosis (HCV-, HBV-)                     | WHITE |
| Validation | RSQ_134  | 65 | F | Liver Cancer     | A   | HCV+                                       | WHITE |
| Validation | RSQ_160b | 71 | M | Liver Cancer     | B   | HCV+                                       | WHITE |
| Validation | RSQ_135  | 47 | M | Liver Cancer     | B   | HCV+                                       | WHITE |
| Validation | RSQ_171b | 71 | M | Liver Cancer     | A   | HCV+                                       | WHITE |
| Validation | RSQ_169b | 66 | M | Liver Cancer     | A   | HCV+                                       | WHITE |
| Validation | RSQ_138  | 78 | F | Liver Cancer     | B   | not documented in EMR                      | WHITE |
| Validation | RSQ_141  | 71 | M | Liver Cancer     | B   | HCV+                                       | WHITE |
| Validation | RSQ_132  | 76 | M | Liver Cancer     | A   | Hemochromatosis, jaundice, Gilbert disease | WHITE |
| Validation | RSQ_188  | 82 | M | Liver Cancer     | C   | Fatty Liver                                | WHITE |
| Validation | RSQ_190  | 67 | M | Liver Cancer     | A   | HCV+                                       | WHITE |
| Validation | RSQ_192  | 78 | F | Liver Cancer     | B   | Alcoholic cirrhosis and steatohepatitis    | WHITE |
| Validation | RSQ_177  | 68 | M | Multiple Myeloma | I   | na                                         | WHITE |
| Validation | RSQ_178  | 67 | M | Multiple Myeloma | II  | na                                         | WHITE |
| Validation | RSQ_179  | 63 | F | Multiple Myeloma | II  | na                                         | WHITE |
| Validation | RSQ_180  | 74 | F | Multiple Myeloma | III | na                                         | WHITE |
| Validation | RSQ_181  | 63 | M | Multiple Myeloma | I   | na                                         | WHITE |
| Validation | RSQ_182  | 28 | M | Multiple Myeloma | I   | na                                         | WHITE |
| Validation | RSQ_183  | 60 | F | Multiple Myeloma | III | na                                         | WHITE |
| Validation | RSQ_184  | 67 | F | Multiple Myeloma | I   | na                                         | WHITE |
| Validation | RSQ_041b | 51 | M | Multiple Myeloma | I   | na                                         | WHITE |
| Validation | RSQ_067  | 72 | M | Non-Cancer       | na  | na                                         | WHITE |
| Validation | RSQ_070  | 62 | M | Non-Cancer       | na  | na                                         | WHITE |
| Validation | RSQ_077  | 64 | F | Non-Cancer       | na  | na                                         | WHITE |
| Validation | RSQ_065  | 74 | F | Non-Cancer       | na  | na                                         | WHITE |
| Validation | RSQ_073  | 25 | F | Non-Cancer       | na  | na                                         | WHITE |
| Validation | RSQ_051  | 60 | F | Non-Cancer       | na  | na                                         | WHITE |
| Validation | RSQ_074  | 54 | F | Non-Cancer       | na  | na                                         | WHITE |
| Validation | RSQ_071  | 21 | M | Non-Cancer       | na  | na                                         | WHITE |
| Validation | RSQ_068  | 64 | F | Non-Cancer       | na  | na                                         | WHITE |
| Validation | RSQ_047  | 27 | F | Non-Cancer       | na  | na                                         | ASIAN |

**\*Abbreviation**

NASH : Non-alcoholic steatohepatitis

HCV : Hepatitis C virus

HBV : Hepatitis B virus

EMR: Electronic medical record

**SupplementaryTable 2 |** Table of sequencing reads, unique reads, exon/intron/intergenic fractions, and fraction of protein coding across all 89 samples from the pilot sample set and independent validation set prepared in different library batches

| Set        | SeqID    | RNA Extraction | Library Preparation | Total Number of Reads | Number of Unique Reads | Exon Fraction | Intron Fraction | Intergenic Fraction | Fraction Protein Coding |
|------------|----------|----------------|---------------------|-----------------------|------------------------|---------------|-----------------|---------------------|-------------------------|
| Pilot      | PP002    | batch 1        | batch 1             | 33192487              | 9477957                | 0.93          | 0.05            | 0.02                | 0.81                    |
| Pilot      | PP003    | batch 1        | batch 1             | 29467052              | 4214981                | 0.86          | 0.11            | 0.03                | 0.82                    |
| Pilot      | PP004    | batch 1        | batch 1             | 29574675              | 3825380                | 0.82          | 0.13            | 0.04                | 0.85                    |
| Pilot      | PP005    | batch 1        | batch 1             | 33768635              | 4088109                | 0.86          | 0.1             | 0.03                | 0.83                    |
| Pilot      | PP007    | batch 1        | batch 1             | 31698177              | 1171491                | 0.84          | 0.13            | 0.03                | 0.89                    |
| Pilot      | PP008    | batch 1        | batch 1             | 30079806              | 10677465               | 0.74          | 0.19            | 0.07                | 0.74                    |
| Pilot      | PP010    | batch 2        | batch 1             | 38503355              | 3863232                | 0.76          | 0.18            | 0.06                | 0.81                    |
| Pilot      | PP011    | batch 2        | batch 1             | 31034252              | 4395327                | 0.86          | 0.11            | 0.04                | 0.84                    |
| Pilot      | PP012    | batch 2        | batch 1             | 35799309              | 4766786                | 0.92          | 0.07            | 0.02                | 0.83                    |
| Pilot      | PP015    | batch 2        | batch 1             | 30093097              | 6852599                | 0.84          | 0.12            | 0.04                | 0.87                    |
| Pilot      | PP016    | batch 2        | batch 1             | 29890017              | 6853766                | 0.86          | 0.1             | 0.04                | 0.81                    |
| Pilot      | PP017    | batch 3        | batch 1             | 34646834              | 6092611                | 0.69          | 0.23            | 0.08                | 0.77                    |
| Pilot      | PP018    | batch 3        | batch 1             | 35833774              | 3469637                | 0.59          | 0.3             | 0.1                 | 0.81                    |
| Pilot      | PP019    | batch 3        | batch 1             | 36506970              | 4711445                | 0.72          | 0.21            | 0.07                | 0.76                    |
| Pilot      | PP020    | batch 3        | batch 1             | 34201040              | 5321020                | 0.8           | 0.15            | 0.05                | 0.76                    |
| Pilot      | PP026    | batch 4        | batch 1             | 40104631              | 3473624                | 0.83          | 0.13            | 0.05                | 0.84                    |
| Pilot      | PP027    | batch 4        | batch 1             | 34476121              | 17271358               | 0.85          | 0.11            | 0.04                | 0.74                    |
| Pilot      | PP029    | batch 4        | batch 1             | 30273014              | 3882069                | 0.9           | 0.08            | 0.02                | 0.84                    |
| Pilot      | PP031    | batch 4        | batch 1             | 35139077              | 9791729                | 0.7           | 0.25            | 0.06                | 0.76                    |
| Pilot      | PP032    | batch 4        | batch 1             | 31904022              | 4016176                | 0.87          | 0.1             | 0.04                | 0.83                    |
| Pilot      | PP035    | batch 4        | batch 2             | 30996985              | 13700958               | 0.86          | 0.11            | 0.04                | 0.78                    |
| Pilot      | PP036    | batch 4        | batch 2             | 36919622              | 7006298                | 0.71          | 0.22            | 0.07                | 0.8                     |
| Pilot      | PP041    | batch 5        | batch 2             | 35773928              | 6240377                | 0.83          | 0.13            | 0.04                | 0.82                    |
| Pilot      | PP043    | batch 5        | batch 2             | 31753026              | 7231832                | 0.71          | 0.22            | 0.07                | 0.81                    |
| Pilot      | PP046    | batch 5        | batch 2             | 30298636              | 4380430                | 0.84          | 0.13            | 0.04                | 0.84                    |
| Pilot      | PP047    | batch 5        | batch 2             | 31468616              | 13876029               | 0.93          | 0.05            | 0.02                | 0.81                    |
| Pilot      | PP048    | batch 5        | batch 2             | 32642636              | 8534075                | 0.82          | 0.14            | 0.05                | 0.81                    |
| Pilot      | PP049    | batch 6        | batch 2             | 37084139              | 9845748                | 0.88          | 0.08            | 0.03                | 0.89                    |
| Pilot      | PP050    | batch 6        | batch 2             | 40532989              | 5076857                | 0.87          | 0.1             | 0.03                | 0.87                    |
| Pilot      | PP055    | batch 6        | batch 2             | 34851176              | 15323436               | 0.91          | 0.07            | 0.02                | 0.83                    |
| Pilot      | PP058    | batch 7        | batch 2             | 36866771              | 5758608                | 0.9           | 0.08            | 0.02                | 0.85                    |
| Pilot      | PP060    | batch 7        | batch 2             | 37126236              | 4991733                | 0.75          | 0.19            | 0.06                | 0.82                    |
| Pilot      | PP061    | batch 7        | batch 2             | 37509562              | 13009859               | 0.78          | 0.18            | 0.03                | 0.78                    |
| Pilot      | PP062    | batch 7        | batch 2             | 36883791              | 21874141               | 0.9           | 0.08            | 0.03                | 0.83                    |
| Pilot      | PP073    | batch 8        | batch 3             | 43566479              | 2482378                | 0.8           | 0.16            | 0.04                | 0.87                    |
| Pilot      | PP074    | batch 8        | batch 3             | 34208260              | 5631056                | 0.92          | 0.06            | 0.02                | 0.85                    |
| Pilot      | PP075    | batch 8        | batch 3             | 31957614              | 5211761                | 0.84          | 0.12            | 0.04                | 0.84                    |
| Pilot      | PP078    | batch 8        | batch 3             | 36596920              | 14457187               | 0.89          | 0.08            | 0.03                | 0.78                    |
| Pilot      | PP087    | batch 9        | batch 3             | 34570617              | 2699261                | 0.8           | 0.15            | 0.05                | 0.84                    |
| Pilot      | PP091    | batch 10       | batch 3             | 38121200              | 3181309                | 0.82          | 0.14            | 0.04                | 0.83                    |
| Pilot      | PP097    | batch 11       | batch 4             | 27998299              | 3867357                | 0.81          | 0.15            | 0.05                | 0.84                    |
| Pilot      | PP098    | batch 11       | batch 4             | 27748334              | 14243418               | 0.68          | 0.24            | 0.08                | 0.75                    |
| Pilot      | PP099    | batch 11       | batch 4             | 28514250              | 6664874                | 0.77          | 0.18            | 0.06                | 0.8                     |
| Pilot      | PP102    | batch 11       | batch 4             | 28850027              | 7551982                | 0.89          | 0.09            | 0.03                | 0.83                    |
| Pilot      | PP103    | batch 11       | batch 4             | 27808286              | 14620805               | 0.45          | 0.4             | 0.15                | 0.65                    |
| Pilot      | PP105    | batch 11       | batch 4             | 30350083              | 8031052                | 0.83          | 0.13            | 0.04                | 0.82                    |
| Pilot      | PP109    | batch 12       | batch 4             | 28245277              | 14323721               | 0.71          | 0.21            | 0.08                | 0.74                    |
| Pilot      | PP111    | batch 12       | batch 4             | 33349408              | 7413209                | 0.77          | 0.17            | 0.06                | 0.83                    |
| Pilot      | PP114    | batch 12       | batch 4             | 33053778              | 2478571                | 0.73          | 0.2             | 0.06                | 0.86                    |
| Pilot      | PP116    | batch 12       | batch 4             | 31973526              | 4755722                | 0.87          | 0.11            | 0.03                | 0.85                    |
| Validation | RSQ_041b | batch 4        | batch 3             | 33772810              | 29487019               | 0.94          | 0.04            | 0.02                | 0.80                    |
| Validation | RSQ_047  | batch 1        | batch 1             | 36641798              | 19005596               | 0.94          | 0.05            | 0.02                | 0.80                    |
| Validation | RSQ_049  | batch 1        | batch 2             | 59627326              | 40642737               | 0.94          | 0.05            | 0.02                | 0.77                    |
| Validation | RSQ_051  | batch 1        | batch 2             | 63448881              | 44393036               | 0.70          | 0.21            | 0.09                | 0.63                    |
| Validation | RSQ_054  | batch 1        | batch 2             | 35688068              | 29607149               | 0.95          | 0.04            | 0.01                | 0.80                    |
| Validation | RSQ_055  | batch 1        | batch 2             | 55042717              | 38897839               | 0.95          | 0.04            | 0.01                | 0.78                    |
| Validation | RSQ_060  | batch 5        | batch 2             | 54988336              | 24189119               | 0.90          | 0.07            | 0.02                | 0.88                    |
| Validation | RSQ_065  | batch 2        | batch 2             | 40294719              | 31024201               | 0.70          | 0.22            | 0.09                | 0.72                    |
| Validation | RSQ_066  | batch 2        | batch 2             | 37682907              | 24430096               | 0.64          | 0.26            | 0.10                | 0.76                    |
| Validation | RSQ_067  | batch 2        | batch 2             | 44706577              | 33873748               | 0.90          | 0.07            | 0.03                | 0.84                    |
| Validation | RSQ_068  | batch 2        | batch 2             | 44448294              | 35928995               | 0.91          | 0.07            | 0.02                | 0.83                    |
| Validation | RSQ_069  | batch 2        | batch 2             | 46440958              | 11272976               | 0.92          | 0.06            | 0.02                | 0.86                    |
| Validation | RSQ_070  | batch 2        | batch 2             | 46662511              | 37811541               | 0.95          | 0.04            | 0.01                | 0.86                    |
| Validation | RSQ_071  | batch 2        | batch 2             | 47314236              | 39458883               | 0.90          | 0.07            | 0.03                | 0.83                    |
| Validation | RSQ_072  | batch 2        | batch 2             | 42356958              | 31455839               | 0.92          | 0.06            | 0.02                | 0.86                    |
| Validation | RSQ_073  | batch 3        | batch 2             | 46146349              | 37190739               | 0.95          | 0.04            | 0.01                | 0.82                    |
| Validation | RSQ_074  | batch 3        | batch 2             | 47427477              | 41824062               | 0.95          | 0.04            | 0.01                | 0.79                    |
| Validation | RSQ_076  | batch 3        | batch 2             | 56514756              | 45112223               | 0.95          | 0.04            | 0.02                | 0.82                    |
| Validation | RSQ_077  | batch 3        | batch 2             | 49317771              | 41506358               | 0.95          | 0.04            | 0.01                | 0.82                    |
| Validation | RSQ_078  | batch 3        | batch 2             | 46629655              | 36123700               | 0.95          | 0.04            | 0.01                | 0.80                    |
| Validation | RSQ_132  | batch 6        | batch 5             | 40631324              | 33192598               | 0.90          | 0.08            | 0.03                | 0.73                    |
| Validation | RSQ_134  | batch 6        | batch 5             | 51608369              | 31562510               | 0.76          | 0.17            | 0.07                | 0.75                    |
| Validation | RSQ_135  | batch 6        | batch 5             | 53647921              | 38218341               | 0.93          | 0.06            | 0.02                | 0.81                    |

|            |          |         |         |          |          |      |      |      |      |
|------------|----------|---------|---------|----------|----------|------|------|------|------|
| Validation | RSQ_138  | batch 7 | batch 5 | 45699045 | 40021174 | 0.92 | 0.06 | 0.03 | 0.89 |
| Validation | RSQ_141  | batch 7 | batch 5 | 41127111 | 34182473 | 0.90 | 0.07 | 0.03 | 0.87 |
| Validation | RSQ_160b | batch 8 | batch 6 | 46286176 | 37326907 | 0.94 | 0.04 | 0.02 | 0.79 |
| Validation | RSQ_169b | batch 7 | batch 3 | 41091726 | 34452215 | 0.93 | 0.05 | 0.02 | 0.87 |
| Validation | RSQ_171b | batch 6 | batch 3 | 43997417 | 35073332 | 0.93 | 0.05 | 0.02 | 0.78 |
| Validation | RSQ_177  | batch 4 | batch 4 | 37506679 | 30534084 | 0.69 | 0.22 | 0.09 | 0.71 |
| Validation | RSQ_178  | batch 4 | batch 4 | 43446571 | 36566835 | 0.95 | 0.04 | 0.01 | 0.79 |
| Validation | RSQ_179  | batch 4 | batch 4 | 45419463 | 35887750 | 0.92 | 0.06 | 0.02 | 0.86 |
| Validation | RSQ_180  | batch 4 | batch 4 | 39794385 | 31445458 | 0.94 | 0.05 | 0.01 | 0.84 |
| Validation | RSQ_181  | batch 4 | batch 4 | 41258803 | 34374819 | 0.93 | 0.05 | 0.02 | 0.83 |
| Validation | RSQ_182  | batch 4 | batch 4 | 46219892 | 39711701 | 0.94 | 0.04 | 0.01 | 0.80 |
| Validation | RSQ_183  | batch 4 | batch 4 | 42546602 | 34105678 | 0.95 | 0.04 | 0.01 | 0.82 |
| Validation | RSQ_184  | batch 4 | batch 4 | 39110078 | 33476255 | 0.61 | 0.28 | 0.11 | 0.62 |
| Validation | RSQ_188  | batch 9 | batch 4 | 45529234 | 40591516 | 0.94 | 0.04 | 0.02 | 0.81 |
| Validation | RSQ_190  | batch 9 | batch 4 | 58526837 | 47914592 | 0.94 | 0.04 | 0.01 | 0.87 |
| Validation | RSQ_192  | batch 9 | batch 4 | 42744939 | 37325748 | 0.94 | 0.04 | 0.02 | 0.85 |

**SupplementaryTable 3 |** Differential expression analysis of pairwise comparison between individual cancer or precancerous condition with respect to non-cancer using DESeq2 (adjusted p-value < 0.01)

| Pair      | gene    | baseMean    | log2FoldChange | lfcSE    | stat        | pvalue   | padj     |
|-----------|---------|-------------|----------------|----------|-------------|----------|----------|
| HCC vs NC | FGB     | 9.54043945  | 2.383146669    | 0.304651 | 7.48821514  | 6.98E-14 | 2.09E-09 |
| HCC vs NC | HRG     | 18.79151349 | 2.317610669    | 0.307693 | 7.196784468 | 6.16E-13 | 9.22E-09 |
| HCC vs NC | FGA     | 10.83667317 | 2.248298714    | 0.304322 | 7.114194336 | 1.13E-12 | 1.12E-08 |
| HCC vs NC | C3      | 18.08752279 | 1.693868459    | 0.287793 | 5.775592922 | 7.67E-09 | 5.73E-05 |
| HCC vs NC | FGG     | 6.074544421 | 1.831111187    | 0.311824 | 5.670245138 | 1.43E-08 | 8.53E-05 |
| HCC vs NC | CP      | 3.568402572 | 1.78771012     | 0.309279 | 5.570509436 | 2.54E-08 | 9.49E-05 |
| HCC vs NC | APOH    | 13.60227841 | 1.675855895    | 0.294434 | 5.5726422   | 2.51E-08 | 9.49E-05 |
| HCC vs NC | HULC    | 2.162614188 | 1.845224079    | 0.314827 | 5.589816874 | 2.27E-08 | 9.49E-05 |
| HCC vs NC | IFITM3  | 177.2018786 | 1.408295495    | 0.2583   | 5.396814888 | 6.78E-08 | 0.000225 |
| HCC vs NC | UGT2B15 | 2.739636172 | 1.546025091    | 0.298857 | 5.019417165 | 5.18E-07 | 0.001549 |
| HCC vs NC | VTN     | 4.420716817 | 1.558599628    | 0.314984 | 4.742574033 | 2.11E-06 | 0.005735 |
| HCC vs NC | CAPRIN2 | 19.7058533  | 0.853553652    | 0.182862 | 4.671994317 | 2.98E-06 | 0.007431 |
| MM vs NC  | CENPE   | 48.17985185 | 1.144883511    | 0.152972 | 7.486721412 | 7.06E-14 | 2.06E-09 |
| MM vs NC  | CPOX    | 25.93497038 | 1.395128166    | 0.200926 | 6.944051494 | 3.81E-12 | 3.70E-08 |
| MM vs NC  | NUSAP1  | 33.50897048 | 1.234770336    | 0.177095 | 6.979509341 | 2.96E-12 | 3.70E-08 |
| MM vs NC  | CA1     | 397.5266752 | 1.722231932    | 0.25239  | 6.800343407 | 1.04E-11 | 7.60E-08 |
| MM vs NC  | NEK2    | 4.616667065 | 2.012818527    | 0.303188 | 6.534030498 | 6.40E-11 | 3.73E-07 |
| MM vs NC  | HBD     | 109.7044137 | 1.606600785    | 0.248832 | 6.439310252 | 1.20E-10 | 5.82E-07 |
| MM vs NC  | HBG2    | 312.1812688 | 2.348168416    | 0.359616 | 6.330390807 | 2.45E-10 | 1.02E-06 |
| MM vs NC  | AHSP    | 46.95512597 | 1.528009653    | 0.248133 | 6.148223471 | 7.84E-10 | 2.85E-06 |
| MM vs NC  | ELL2    | 21.91988323 | 1.344413464    | 0.220952 | 6.084177716 | 1.17E-09 | 2.92E-06 |
| MM vs NC  | MKI67   | 83.76610812 | 1.265283784    | 0.207217 | 6.102320006 | 1.05E-09 | 2.92E-06 |
| MM vs NC  | AGL     | 30.73272804 | 1.505269004    | 0.247266 | 6.074314218 | 1.25E-09 | 2.92E-06 |
| MM vs NC  | EPB42   | 57.47809392 | 1.551699089    | 0.253732 | 6.100135774 | 1.06E-09 | 2.92E-06 |
| MM vs NC  | HBG1    | 112.8246854 | 2.300701344    | 0.366232 | 6.067148729 | 1.30E-09 | 2.92E-06 |
| MM vs NC  | SMC4    | 116.8891212 | 0.738932852    | 0.122814 | 6.017945964 | 1.77E-09 | 3.67E-06 |
| MM vs NC  | ASPM    | 25.99235817 | 1.343802169    | 0.224609 | 5.983071971 | 2.19E-09 | 4.25E-06 |
| MM vs NC  | NUDT4   | 112.9786718 | 1.180281587    | 0.206412 | 5.714481087 | 1.10E-08 | 2.00E-05 |
| MM vs NC  | PSME4   | 129.6888427 | 1.160360801    | 0.208525 | 5.560476508 | 2.69E-08 | 4.61E-05 |
| MM vs NC  | GYP A   | 69.35867145 | 1.445922865    | 0.25991  | 5.548700732 | 2.88E-08 | 4.65E-05 |
| MM vs NC  | KAT2B   | 262.1259581 | 1.376488595    | 0.249432 | 5.504032712 | 3.71E-08 | 5.39E-05 |
| MM vs NC  | ABCB10  | 41.31134237 | 1.396088965    | 0.252814 | 5.512090295 | 3.55E-08 | 5.39E-05 |
| MM vs NC  | ENTPD5  | 26.59105754 | 1.717036186    | 0.309655 | 5.495693776 | 3.89E-08 | 5.39E-05 |
| MM vs NC  | CD96    | 33.6920111  | 1.740101597    | 0.3158   | 5.448193767 | 5.09E-08 | 6.73E-05 |
| MM vs NC  | SPTA1   | 95.98507999 | 1.277217476    | 0.236548 | 5.391625625 | 6.98E-08 | 8.84E-05 |
| MM vs NC  | TFRC    | 99.8315754  | 1.156604055    | 0.216347 | 5.343871712 | 9.10E-08 | 0.00011  |
| MM vs NC  | BBOF1   | 102.2996997 | 1.323527358    | 0.2483   | 5.319371668 | 1.04E-07 | 0.000121 |
| MM vs NC  | AIDA    | 93.76039802 | 0.700482445    | 0.132373 | 5.292685612 | 1.21E-07 | 0.000135 |
| MM vs NC  | IFIT1B  | 62.93158945 | 1.462521801    | 0.276723 | 5.263410008 | 1.41E-07 | 0.000152 |
| MM vs NC  | CCNA2   | 8.926517153 | 1.471093497    | 0.285828 | 5.148513154 | 2.63E-07 | 0.000273 |
| MM vs NC  | TFDP1   | 192.2094247 | 1.416020274    | 0.276331 | 5.101798841 | 3.36E-07 | 0.000326 |
| MM vs NC  | HBM     | 36.38217871 | 1.31495253     | 0.257367 | 5.102997052 | 3.34E-07 | 0.000326 |
| MM vs NC  | USP7    | 155.0058717 | 0.653885398    | 0.128764 | 5.079074351 | 3.79E-07 | 0.000356 |
| MM vs NC  | SLC6A8  | 29.56748222 | 1.612394482    | 0.315417 | 5.070486199 | 3.97E-07 | 0.000359 |
| MM vs NC  | ALAS2   | 406.6065512 | 1.600394651    | 0.313128 | 5.059922663 | 4.19E-07 | 0.000359 |
| MM vs NC  | OSBP2   | 212.0418408 | 1.498884226    | 0.294226 | 5.060561911 | 4.18E-07 | 0.000359 |
| MM vs NC  | UBB     | 920.1466897 | 0.744822366    | 0.147424 | 5.051848057 | 4.38E-07 | 0.000364 |
| MM vs NC  | RAP1GAP | 7.154304682 | 1.948817497    | 0.372504 | 5.040172452 | 4.65E-07 | 0.000376 |
| MM vs NC  | GAB1    | 46.98928125 | 0.946297508    | 0.187896 | 5.034762379 | 4.78E-07 | 0.000376 |

|          |            |             |              |          |              |          |          |
|----------|------------|-------------|--------------|----------|--------------|----------|----------|
| MM vs NC | ZNF385D    | 56.25431831 | -1.649886457 | 0.334212 | -5.021590136 | 5.12E-07 | 0.000393 |
| MM vs NC | MYBL2      | 32.66205417 | 1.331210402  | 0.264978 | 5.005465358  | 5.57E-07 | 0.000406 |
| MM vs NC | HBE1       | 9.084378536 | 1.869498382  | 0.364036 | 5.009707027  | 5.45E-07 | 0.000406 |
| MM vs NC | TMEM14B    | 26.3168985  | 1.004927996  | 0.202273 | 4.969204011  | 6.72E-07 | 0.000477 |
| MM vs NC | TMEM56     | 33.16949522 | 1.310236151  | 0.2642   | 4.953422664  | 7.29E-07 | 0.000505 |
| MM vs NC | HIST1H1B   | 68.67388896 | 1.091995954  | 0.220934 | 4.939332953  | 7.84E-07 | 0.000531 |
| MM vs NC | GYPC       | 201.1491307 | 1.077350509  | 0.223248 | 4.821367024  | 1.43E-06 | 0.000943 |
| MM vs NC | IFI27      | 41.9367921  | 1.530523428  | 0.315312 | 4.809833729  | 1.51E-06 | 0.000977 |
| MM vs NC | SOX6       | 46.50591066 | 1.207213296  | 0.251325 | 4.798381997  | 1.60E-06 | 0.000991 |
| MM vs NC | FCGR2A     | 85.78951546 | 1.485128883  | 0.306855 | 4.799032138  | 1.59E-06 | 0.000991 |
| MM vs NC | TMOD1      | 59.93886672 | 1.019369045  | 0.213882 | 4.765453096  | 1.88E-06 | 0.001143 |
| MM vs NC | CREB3L1    | 14.35800377 | 1.594848362  | 0.347123 | 4.730732815  | 2.24E-06 | 0.001329 |
| MM vs NC | PRDX2      | 33.03810926 | 1.160061025  | 0.246038 | 4.709081177  | 2.49E-06 | 0.001449 |
| MM vs NC | RSAD2      | 39.74329843 | 1.12960219   | 0.241446 | 4.677795107  | 2.90E-06 | 0.001655 |
| MM vs NC | CENPF      | 260.3829103 | 1.207317796  | 0.258951 | 4.649348614  | 3.33E-06 | 0.001864 |
| MM vs NC | HMGB2      | 285.4058456 | 0.55205218   | 0.119428 | 4.622764274  | 3.79E-06 | 0.00208  |
| MM vs NC | OAT        | 27.97001255 | 0.925873663  | 0.201972 | 4.584834298  | 4.54E-06 | 0.002449 |
| MM vs NC | SDC4       | 28.44871687 | -1.540713291 | 0.344329 | -4.572486359 | 4.82E-06 | 0.002455 |
| MM vs NC | ST6GALNAC4 | 13.96679824 | 1.178040605  | 0.257751 | 4.572888545  | 4.81E-06 | 0.002455 |
| MM vs NC | ITGB3BP    | 76.46566185 | -1.153878384 | 0.252465 | -4.568252228 | 4.92E-06 | 0.002455 |
| MM vs NC | PHOSPHO1   | 38.80438161 | 1.219476219  | 0.266689 | 4.565757106  | 4.98E-06 | 0.002455 |
| MM vs NC | PRC1       | 17.12829389 | 1.022540788  | 0.223562 | 4.576389813  | 4.73E-06 | 0.002455 |
| MM vs NC | HSD17B4    | 67.99839238 | 0.515489438  | 0.113759 | 4.532992822  | 5.82E-06 | 0.002821 |
| MM vs NC | CDH1       | 5.633976149 | 1.493656168  | 0.326341 | 4.522846714  | 6.10E-06 | 0.002911 |
| MM vs NC | PTK7       | 11.21095149 | -1.567281921 | 0.369238 | -4.503992264 | 6.67E-06 | 0.003131 |
| MM vs NC | TPX2       | 19.51869751 | 1.023492939  | 0.227436 | 4.499137419  | 6.82E-06 | 0.003152 |
| MM vs NC | CDK1       | 10.25220254 | 1.139522542  | 0.255286 | 4.474764811  | 7.65E-06 | 0.003479 |
| MM vs NC | SLC25A39   | 154.5738156 | 1.154106148  | 0.257935 | 4.464307809  | 8.03E-06 | 0.003543 |
| MM vs NC | TOP2A      | 36.19644848 | 0.897291219  | 0.201017 | 4.466482024  | 7.95E-06 | 0.003543 |
| MM vs NC | TSPYL2     | 45.71344261 | 1.093161035  | 0.245057 | 4.455018652  | 8.39E-06 | 0.003644 |
| MM vs NC | PPP1CB     | 274.1173484 | 0.680601249  | 0.153927 | 4.421234884  | 9.81E-06 | 0.004201 |
| MM vs NC | ARG1       | 21.02100374 | 1.25925184   | 0.285379 | 4.402402499  | 1.07E-05 | 0.004516 |
| MM vs NC | MITD1      | 137.2569773 | -0.801823857 | 0.18248  | -4.393960127 | 1.11E-05 | 0.004538 |
| MM vs NC | ELOVL6     | 5.638687321 | 1.235211734  | 0.280975 | 4.392739902  | 1.12E-05 | 0.004538 |
| MM vs NC | KEL        | 6.82920782  | 1.312061972  | 0.297877 | 4.392145889  | 1.12E-05 | 0.004538 |
| MM vs NC | SLC38A5    | 14.71133594 | 1.231965985  | 0.28052  | 4.385157009  | 1.16E-05 | 0.004559 |
| MM vs NC | SOCS2      | 21.85434465 | 1.128616205  | 0.256735 | 4.386448461  | 1.15E-05 | 0.004559 |
| MM vs NC | LGALS3     | 85.63099415 | 0.773452672  | 0.177256 | 4.366099205  | 1.26E-05 | 0.004844 |
| MM vs NC | LINC01781  | 4.065055803 | -1.618823759 | 0.370861 | -4.367305996 | 1.26E-05 | 0.004844 |
| MM vs NC | CISD2      | 64.32206286 | 1.140611121  | 0.261771 | 4.34807704   | 1.37E-05 | 0.005192 |
| MM vs NC | HPS1       | 65.19810328 | 0.785210199  | 0.180813 | 4.343062644  | 1.41E-05 | 0.005244 |
| MM vs NC | C9orf40    | 18.50369144 | 1.401356403  | 0.320284 | 4.338460561  | 1.43E-05 | 0.005287 |
| MM vs NC | ZNF542P    | 128.7646165 | -1.418097998 | 0.333639 | -4.328711363 | 1.50E-05 | 0.005457 |
| MM vs NC | WNK1       | 828.4506104 | 0.874942514  | 0.202978 | 4.307710665  | 1.65E-05 | 0.005657 |
| MM vs NC | CRYM       | 8.319848528 | 1.667297124  | 0.371785 | 4.307381936  | 1.65E-05 | 0.005657 |
| MM vs NC | HECTD2     | 14.3573525  | -1.170675606 | 0.269229 | -4.311272144 | 1.62E-05 | 0.005657 |
| MM vs NC | FOXO4      | 74.92939478 | 0.820882448  | 0.190385 | 4.31327278   | 1.61E-05 | 0.005657 |
| MM vs NC | ARHGAP11A  | 29.01664018 | 0.857005285  | 0.198808 | 4.31747447   | 1.58E-05 | 0.005657 |
| MM vs NC | SAMD9      | 122.587491  | 0.821454042  | 0.190795 | 4.304650949  | 1.67E-05 | 0.005661 |
| MM vs NC | WDR11-AS1  | 119.9053813 | -1.376780688 | 0.325767 | -4.286673436 | 1.81E-05 | 0.006068 |



|            |           |             |              |          |              |          |          |
|------------|-----------|-------------|--------------|----------|--------------|----------|----------|
| MM vs NC   | SKA1      | 2.46040502  | 1.631744419  | 0.369435 | 4.281870501  | 1.85E-05 | 0.00613  |
| MM vs NC   | YBX1      | 1213.47061  | 0.462254723  | 0.108266 | 4.269644919  | 1.96E-05 | 0.006263 |
| MM vs NC   | CTSB      | 134.6444462 | 0.974264083  | 0.227936 | 4.272190206  | 1.94E-05 | 0.006263 |
| MM vs NC   | ARMC3     | 25.47628363 | -1.400115583 | 0.327944 | -4.271500174 | 1.94E-05 | 0.006263 |
| MM vs NC   | RRM2      | 10.68177932 | 1.195474677  | 0.280142 | 4.263385109  | 2.01E-05 | 0.006302 |
| MM vs NC   | HBB       | 7282.040547 | 1.110560161  | 0.259698 | 4.26464549   | 2.00E-05 | 0.006302 |
| MM vs NC   | YBX3      | 556.1581858 | 0.894395866  | 0.209786 | 4.260368036  | 2.04E-05 | 0.00632  |
| MM vs NC   | CREG1     | 133.8111897 | 0.906388177  | 0.212979 | 4.254127913  | 2.10E-05 | 0.00643  |
| MM vs NC   | RHAG      | 15.65921616 | 1.282224529  | 0.300428 | 4.248028996  | 2.16E-05 | 0.006539 |
| MM vs NC   | MMP8      | 13.99073601 | 1.561964406  | 0.360793 | 4.233369769  | 2.30E-05 | 0.006908 |
| MM vs NC   | GRHL1     | 41.16232348 | -1.448736175 | 0.35447  | -4.225060058 | 2.39E-05 | 0.007095 |
| MM vs NC   | BLVRB     | 56.82702682 | 1.082675745  | 0.257618 | 4.198018279  | 2.69E-05 | 0.007838 |
| MM vs NC   | H3F3B     | 327.173554  | -0.519226428 | 0.123673 | -4.198191179 | 2.69E-05 | 0.007838 |
| MM vs NC   | HMMR      | 13.91332551 | 0.973499071  | 0.232528 | 4.193325949  | 2.75E-05 | 0.007845 |
| MM vs NC   | CMPK2     | 21.74447826 | 1.264338418  | 0.300044 | 4.195063494  | 2.73E-05 | 0.007845 |
| MM vs NC   | SLC4A1    | 550.611478  | 1.152463857  | 0.274393 | 4.184964937  | 2.85E-05 | 0.00806  |
| MM vs NC   | ALAD      | 43.97201475 | 0.754288665  | 0.180674 | 4.178216434  | 2.94E-05 | 0.008223 |
| MM vs NC   | LINC00989 | 368.9499221 | -1.286938205 | 0.311552 | -4.174752837 | 2.98E-05 | 0.00827  |
| MM vs NC   | KIF11     | 13.31781773 | 0.999792395  | 0.24017  | 4.165748658  | 3.10E-05 | 0.008522 |
| MM vs NC   | USP32     | 95.34787244 | 0.534980402  | 0.128713 | 4.157324881  | 3.22E-05 | 0.008759 |
| MM vs NC   | UROD      | 42.67164213 | 0.750573149  | 0.181193 | 4.145849797  | 3.39E-05 | 0.009125 |
| MM vs NC   | USP15     | 175.4236805 | 0.840247824  | 0.202991 | 4.137160504  | 3.52E-05 | 0.00939  |
| MM vs NC   | UBE2B     | 75.41679511 | 0.882883646  | 0.213737 | 4.129313001  | 3.64E-05 | 0.009628 |
| Cirr vs NC | AGL       | 33.02779405 | 2.049587079  | 0.32065  | 6.327377054  | 2.49E-10 | 6.96E-06 |
| Cirr vs NC | FCGR2A    | 86.81797865 | 2.05688026   | 0.327841 | 6.192870516  | 5.91E-10 | 8.24E-06 |
| Cirr vs NC | RAP1GAP   | 8.560546486 | 2.833698078  | 0.438573 | 5.589457958  | 2.28E-08 | 0.000212 |
| Cirr vs NC | OSBP2     | 233.2090641 | 2.082222621  | 0.367839 | 5.516218675  | 3.46E-08 | 0.000242 |
| Cirr vs NC | GNS       | 22.17810447 | 1.505231445  | 0.284585 | 5.278076271  | 1.31E-07 | 0.000728 |
| Cirr vs NC | LRP1      | 37.78641684 | 1.947514541  | 0.368454 | 5.165707804  | 2.40E-07 | 0.001114 |
| Cirr vs NC | SCML1     | 5.436611454 | 2.094494958  | 0.396777 | 5.13415231   | 2.83E-07 | 0.00113  |
| Cirr vs NC | IFITM3    | 145.5140589 | 1.507483216  | 0.310076 | 4.825563155  | 1.40E-06 | 0.004868 |
| Cirr vs NC | TRAC      | 60.16050961 | -1.509782361 | 0.316472 | -4.775376961 | 1.79E-06 | 0.00556  |
| Cirr vs NC | LEF1      | 53.65052484 | -1.582519146 | 0.336445 | -4.718630559 | 2.37E-06 | 0.006624 |
| Cirr vs NC | CD3D      | 17.75869486 | -1.776581903 | 0.373353 | -4.680428666 | 2.86E-06 | 0.00726  |
| Cirr vs NC | NSRP1     | 161.5807408 | -0.708892776 | 0.151997 | -4.66033095  | 3.16E-06 | 0.007326 |
| Cirr vs NC | L3MBTL4   | 13.33743712 | 1.201778872  | 0.259447 | 4.644215836  | 3.41E-06 | 0.007326 |
| Cirr vs NC | SYF2      | 231.3033469 | -0.729634008 | 0.158187 | -4.61048779  | 4.02E-06 | 0.007437 |
| Cirr vs NC | PIK3R1    | 154.7487437 | -0.840313031 | 0.183889 | -4.565421758 | 4.98E-06 | 0.007437 |
| Cirr vs NC | CD96      | 24.48352807 | 1.600009389  | 0.345904 | 4.571088362  | 4.85E-06 | 0.007437 |
| Cirr vs NC | EIF1      | 1069.777812 | 1.134383481  | 0.248144 | 4.562082104  | 5.06E-06 | 0.007437 |
| Cirr vs NC | METTL9    | 126.20809   | 0.934080489  | 0.202687 | 4.607296804  | 4.08E-06 | 0.007437 |
| Cirr vs NC | TAPBP     | 43.35068267 | 0.980566406  | 0.214554 | 4.571537606  | 4.84E-06 | 0.007437 |
| Cirr vs NC | RPL36A    | 198.4871465 | -0.854627016 | 0.188111 | -4.540818879 | 5.60E-06 | 0.007816 |
| Cirr vs NC | DAP       | 477.4624866 | 1.656113341  | 0.36072  | 4.50385259   | 6.67E-06 | 0.008865 |
| MGUS vs NC | TRADD     | 7.265471722 | 1.829025466  | 0.345767 | 5.289766229  | 1.22E-07 | 0.003718 |





**Supplementary Table 5 |** Top 10 learning vector quantization feature set (LVQ gene set) distinguished between individual cancer or precancerous condition with respect to non-cancer

| Pair       | Top 10 LVQ gene |
|------------|-----------------|
| HCC vs NC  | FGB             |
| HCC vs NC  | FGA             |
| HCC vs NC  | CP              |
| HCC vs NC  | C3              |
| HCC vs NC  | IFITM3          |
| HCC vs NC  | FGG             |
| HCC vs NC  | ATP1B1          |
| HCC vs NC  | HRG             |
| HCC vs NC  | APOE            |
| HCC vs NC  | DHCR24          |
| MM vs NC   | NEK2            |
| MM vs NC   | CENPE           |
| MM vs NC   | HBG2            |
| MM vs NC   | NUSAP1          |
| MM vs NC   | HBG1            |
| MM vs NC   | ELL2            |
| MM vs NC   | AIDA            |
| MM vs NC   | CA1             |
| MM vs NC   | CPOX            |
| MM vs NC   | EPB42           |
| MGUS vs NC | FPR3            |
| MGUS vs NC | SMC4            |
| MGUS vs NC | TRADD           |
| MGUS vs NC | TXNDC16         |
| MGUS vs NC | VCAM1           |
| MGUS vs NC | ASPM            |
| MGUS vs NC | DNAH1           |
| MGUS vs NC | AL121603.2      |
| MGUS vs NC | FAM109B         |
| MGUS vs NC | FMN1            |
| Cirr vs NC | ABCB7           |
| Cirr vs NC | HIST1H2BF       |
| Cirr vs NC | PSIP1           |
| Cirr vs NC | TMEM150C        |
| Cirr vs NC | ZC3H6           |
| Cirr vs NC | C9orf16         |
| Cirr vs NC | CPQ             |
| Cirr vs NC | DYNC112         |
| Cirr vs NC | ECM1            |
| Cirr vs NC | HIST1H2AE       |
